# Supplementary material
Source: PubMed Central journal article supplement (PMC7441647)
Supplement: NIHMS1615366-supplement-Supplementary_Material.pdf [file NIHMS1615366-supplement-Supplementary_Material.pdf]

## Supplemental Material: Calculations of probability of APOL1 risk genotype in relatives (Table 1)

We make the following assumptions based the observed population frequency of APOL1 risk genotype and Hardy Weinberg equilibrium:  
Population frequency of aa (APOL1 risk) genotype:  $p^2 = 0.150$  (average in African Americans)  
Allele frequency of a (APOL1 risk allele):  $p = 0.387$ ; Allele frequency of A (non-risk allele):  $q = 1-p = 1-0.387 = 0.613$ ;  
Population frequency of Aa genotype:  $2pq = 0.474$ ; Population frequency of AA genotype:  $q^2 = 0.376$ .

### Q1. Given patient with genotype aa, what is the probability of sibling with genotype aa?

#### **Step 1: Given patient with genotype aa, what are probabilities of possible parental genotypes?**

First, we note that based on Mendelian transmission laws and Hardy Weinberg equilibrium the following relationships hold:

$$P(\text{pt aa} | \text{parents Aa/Aa}) = 0.25$$

$$P(\text{parents Aa/Aa}) = 0.474 * 0.474 = 0.225$$

$$P(\text{pt aa} | \text{parents Aa/aa or aa/Aa}) = 0.5$$

$$P(\text{parents Aa/aa or aa/Aa}) = 2 * 0.474 * 0.15 = 2 * 0.0711$$

$$P(\text{pt aa} | \text{parents aa/aa}) = 1$$

$$P(\text{parents aa/aa}) = 0.15 * 0.15 = 0.0225$$

Then, the probabilities of possible parental genotypes, given the patient has genotype aa can be computed as follows:

$$P(\text{parents Aa/Aa} | \text{pt aa}) = (0.25 * 0.225) / (0.25 * 0.225 + 0.5 * 2 * 0.0711 + 1 * 0.0225) = 0.3753754$$

$$P(\text{parents aa/Aa or Aa/aa} | \text{pt aa}) = (2 * 0.5 * 0.0711) / (0.25 * 0.225 + 0.5 * 2 * 0.0711 + 1 * 0.0225) = 0.4744745$$

$$P(\text{parents aa/aa} | \text{pt aa}) = 0.0225 / (0.25 * 0.225 + 0.5 * 2 * 0.0711 + 1 * 0.0225) = 0.1501502$$

#### **Step 2: Given probabilities of each parental genotype combination for patient aa, what is probability of sibling genotype aa?**

$$P(\text{sibling aa \& parents Aa/Aa} | \text{pt aa}) = P(\text{sibling aa} | \text{parents Aa/Aa}) * P(\text{parents Aa/Aa} | \text{pt aa}) = 0.25 * 0.3753754 = 0.09384385$$

$$P(\text{sibling aa \& parents aa/Aa or Aa/aa} | \text{pt aa}) = P(\text{sibling aa} | \text{parents aa/Aa or Aa/aa}) * P(\text{parents aa/Aa or Aa/aa} | \text{pt aa}) = 0.5 * 0.4744745 = 0.2372373$$

$$P(\text{sibling aa \& parents aa/aa} | \text{pt aa}) = P(\text{sibling aa} | \text{parents aa/aa}) * P(\text{parents aa/aa} | \text{pt aa}) = 1 * 0.1501502 = 0.1501502$$

Overall probability of a sibling with genotype aa given patient with genotype aa represents the sum of above probabilities across all possible parental genotypes:  $0.09384385 + 0.2372373 + 0.1501502 = 0.4812314 = 48\%$

### Q2. Given patient with genotype Aa, what is the probability of sibling with genotype aa?

#### **Step 1. Given patient with genotype Aa, what are probabilities of possible parental genotypes?**

First we note that based on Mendelian transmission laws and Hardy Weinberg equilibrium the following relationships hold:

$$P(\text{pt Aa} | \text{parents AA/Aa or Aa/AA}) = 0.5$$

$$P(\text{parents AA/Aa or Aa/AA}) = 2 * 0.474 * 0.376 = 0.356448$$

$$P(\text{pt Aa} | \text{parents AA/aa or aa/AA}) = 1$$

$$P(\text{parents AA/aa or aa/AA}) = 2 * 0.15 * 0.376 = 0.1128$$

$$P(\text{pt Aa} | \text{parents Aa/aa or aa/Aa}) = 0.5$$

$$P(\text{parents Aa/aa or aa/Aa}) = 2 * 0.474 * 0.150 = 0.1422$$

$$P(\text{pt Aa} | \text{parents Aa/Aa}) = 0.5$$

$$P(\text{parents Aa/Aa}) = 0.474 * 0.474 = 0.224676$$

Then the probabilities of possible parental genotypes, given the patient has genotype Aa can be computed as follows:

$$P(\text{parents AA/Aa or Aa/AA} | \text{pt Aa}) = (0.5 * 0.356448) / (0.5 * 0.356448 + 0.1128 + 0.5 * 0.1422 + 0.5 * 0.224676) = 0.3756339$$

$$P(\text{parents AA/aa or aa/AA} | \text{pt Aa}) = 0.1128 / (0.5 * 0.356448 + 0.1128 + 0.5 * 0.1422 + 0.5 * 0.224676) = 0.237743$$

$$P(\text{parents Aa/aa or aa/Aa} | \text{pt Aa}) = (0.5 * 0.1422) / (0.5 * 0.356448 + 0.1128 + 0.5 * 0.1422 + 0.5 * 0.224676) = 0.1498539$$

$$P(\text{parents Aa/Aa} | \text{pt Aa}) = (0.5 * 0.224676) / (0.5 * 0.356448 + 0.1128 + 0.5 * 0.1422 + 0.5 * 0.224676) = 0.2367692$$

#### **Step 2: Given probabilities of each parental genotype combination for patient Aa, what is probability of sibling genotype aa?**

$$P(\text{sibling aa \& parents AA/Aa or Aa/AA} | \text{pt Aa}) = P(\text{sibling aa} | \text{parents AA/Aa or Aa/AA}) * P(\text{parents AA/Aa or Aa/AA} | \text{pt Aa}) = 0 * 0.3756339 = 0$$

$$P(\text{sibling aa \& parents AA/aa or aa/AA} | \text{pt Aa}) = P(\text{sibling aa} | \text{parents AA/aa or aa/AA}) * P(\text{parents AA/aa or aa/AA} | \text{pt Aa}) = 0 * 0.237743 = 0$$

$$P(\text{sibling aa \& parents Aa/aa or aa/Aa} | \text{pt Aa}) = P(\text{sibling aa} | \text{parents Aa/aa or aa/Aa}) * P(\text{parents Aa/aa or aa/Aa} | \text{pt Aa}) = 0.5 * 0.1498539 = 0.07492695$$

$$P(\text{sibling aa \& parents Aa/Aa} | \text{pt Aa}) = P(\text{sibling aa} | \text{parents Aa/Aa}) * P(\text{parents Aa/Aa} | \text{pt Aa}) = 0.25 * 0.2367692 = 0.0591923$$

Overall probability of a sibling with genotype aa given patient with genotype Aa represents the sum of above probabilities across all possible parental genotypes:  $0 + 0 + 0.07492695 + 0.0591923 = 0.1341193 = 13\%$

**Q3. Given patient with genotype AA, what is the probability of sibling with genotype aa?**

***Step 1. Given patient with genotype AA, what are probabilities of possible parental genotypes?***

First, we note that based on Mendelian transmission laws and Hardy Weinberg equilibrium the following relationships hold:

$$P(\text{pt AA} | \text{parents Aa/Aa}) = 0.25$$

$$P(\text{parents Aa/Aa}) = 0.474 * 0.474 = 0.225$$

$$P(\text{pt AA} | \text{parents AA/Aa or Aa/AA}) = 0.5$$

$$P(\text{parents AA/Aa or Aa/AA}) = 2 * 0.474 * 0.376 = 0.3564$$

$$P(\text{pt AA} | \text{parents AA/AA}) = 1$$

$$P(\text{parents AA/AA}) = 0.376 * 0.376 = 0.141376$$

Then, the probabilities of possible parental genotypes, given the patient has genotype AA can be computed as follows:

$$P(\text{parents Aa/Aa} | \text{pt AA}) = (0.25 * 0.225) / (0.25 * 0.225 + 0.5 * 0.3564 + 1 * 0.141376) = 0.1496703$$

$$P(\text{parents AA/AA} | \text{pt AA}) = 0.141376 / (0.25 * 0.225 + 0.5 * 0.3564 + 1 * 0.141376) = 0.3761741$$

$$P(\text{parents AA/Aa or Aa/AA} | \text{pt AA}) = (0.5 * 0.3564) / (0.25 * 0.225 + 0.5 * 0.3564 + 1 * 0.141376) = 0.4741556$$

***Step 2: Given probabilities of each parental genotype combination for patient AA, what is probability of sibling genotype aa?***

$$P(\text{sibling aa \& parents Aa/Aa} | \text{pt AA}) = P(\text{sibling aa} | \text{parents Aa/Aa}) * P(\text{parents Aa/Aa} | \text{pt AA}) = 0.25 * 0.1496703 = 0.03741758$$

$$P(\text{sibling aa \& parents AA/AA} | \text{pt AA}) = P(\text{sibling aa} | \text{parents AA/AA}) * P(\text{parents AA/AA} | \text{pt AA}) = 0 * 0.3761741 = 0$$

$$P(\text{sibling aa \& parents Aa/AA or AA/Aa} | \text{pt AA}) = P(\text{sibling aa} | \text{parents Aa/AA or AA/Aa}) * P(\text{parents Aa/AA or AA/Aa} | \text{pt AA}) = 0 * 0.4741556 = 0$$

Overall probability of a sibling with genotype aa given patient with genotype AA represents the sum of above probabilities across all possible parental genotypes:  $0.03741758 + 0 + 0 = 0.03741758 = 4\%$

**Q4. Given patient with genotype aa, what is the probability of parent with genotype aa?**

*Probability of possible parental genotypes from Q1 above:*

$$P(\text{parents Aa/Aa} | \text{pt aa}) = 0.3753754$$

$$P(\text{parents aa/Aa or Aa/aa} | \text{pt aa}) = 0.4744745$$

$$P(\text{parents aa/aa} | \text{pt aa}) = 0.1501502$$

$$P(\text{parent aa} | \text{pt aa}) = 0 + 0.5 * 0.4744745 + 0.1501502 = 0.3873875 = 39\%$$

**Q5. Given patient with genotype Aa, what is the probability of parent with genotype aa?**

*Probability of possible parental genotypes from Q2 above:*

$$P(\text{parents AA/Aa or Aa/AA} | \text{pt Aa}) = 0.3756339$$

$$P(\text{parents AA/aa or aa/AA} | \text{pt Aa}) = 0.237743$$

$$P(\text{parents Aa/aa or aa/Aa} | \text{pt Aa}) = 0.1498539$$

$$P(\text{parents Aa/Aa} | \text{pt Aa}) = 0.2367692$$

$$P(\text{parent aa} | \text{pt Aa}) = 0 + 0.5 * 0.237743 + 0.5 * 0.1498539 + 0 = 0.1937985 = 19\%$$

**Q6. Given patient with genotype aa, what is the probability of child with genotype aa?**

Probabilities of possible spouse genotypes (correspond to population genotype frequencies):

$$P(\text{spouse aa}) = 0.150; P(\text{spouse Aa}) = 0.474; P(\text{spouse AA}) = 0.376$$

$$P(\text{child aa} | \text{pt aa}) = 0.150 + 0.5 * 0.474 + 0 = 0.387 = 39\%$$

**Q7. Given patient with genotype Aa, what is the probability of child with genotype aa?**

$$P(\text{child aa} | \text{pt Aa}) = 0.5 * 0.150 + 0.25 * 0.474 + 0 = 0.1935 = 19\%$$

**Q8. Given patient with genotype AA, what is the probability of child with genotype aa?**

$$P(\text{child aa} | \text{pt AA}) = 0 * 0.150 + 0 * 0.474 + 0 * 0.376 = 0\%$$
